# Supplementary material
Source: publisher figshare collection journal article supplement (https://frontiersin.figshare.com/ndownloader/files/23186228)
Supplement: Supplementary file 1 [file 23186228]

## Sheet: Ark1
		1	2	3	4	5	6	7	8	9	10	11	12	13	14	15	16	17	18	19	20	21	22	23	24	25	26	27	28	29	30	31	32	33	34	35	36	37	38	39	40	41	42
1	FJ347644_Sclerolinum_brattstromi
2	KF444428_Osedax_deceptionensis	24.3
3	MH616081_Osedax_BioSuOr_2	23	22.8
4	FJ347638_Osedax_jabba	20.1	22.1	18.4
5	FJ347621_Osedax_talkovici	22.1	19.2	19.5	17.1
6	FJ347635_Osedax_knutei	21.8	20.1	19.3	17	16.9
7	FJ347624_Osedax_tiburon	21.6	19.9	21.5	17.3	17.7	16.7
8	KP119564_Osedax_priapus	21.4	20.1	17.8	16.4	17.1	17.9	16.4
9	KT860548_Osedax_Mediterranea	21.1	19.7	18.2	17.4	16	20.2	17.4	14.6
10	FJ347642_Osedax_sigridae	20.5	17.9	18.6	17.6	16.4	18.3	16.1	13.7	13.6
11	FM998083_Osedax_Sagami5	20.9	20.3	18.6	17.7	17.2	17.9	17.2	14.6	14.3	10.5
12	KJ598039_Osedax_nordenskjoeldi	21.8	19.7	18.6	18.1	17	16.6	14.8	15.7	17.9	15.6	16.8
13	FM998110_Osedax_Sagami8	21.6	19.2	19.3	17.5	18.1	15.8	16.7	18.1	18.8	17.1	17.5	16
14	FJ347631_Osedax_westernflyer	21.8	19.6	19.3	17.4	18.1	16	16.7	18.2	18.8	17.1	17.5	16.2	0.5
15	MH616036_Osedax_BioSuOr_1	21.7	18.9	17.4	15.7	17.8	15.9	17.4	14	14.9	15.1	15.7	14.9	14.6	15.1
16	FJ347626_Osedax_dockricketts	21	20.7	21.7	16.9	17.1	15.1	15.1	16.5	17.4	17	17	16.2	14.2	14.5	12.5
17	FM998107_Osedax_Sagami6	21.1	20.8	22.4	17	17.3	14.8	15.1	16.4	17.1	17.1	17	16.4	14.3	14.6	13	0.9
18	MH616075_Osedax_BioSuOr_3	25.2	21.1	19.7	19	20.6	18.2	18.4	17	19	18.6	18.8	17.6	17	17	16.6	16	16.4
19	EU236218_Osedax_ventana	21.2	19.7	19.5	15.6	17.6	16.4	14.6	16.1	17.8	16.2	16.6	15.1	15.6	15.9	14.9	13.5	13.9	16.4
20	KP119563_Osedax_ryderi	21.7	20.5	19.5	16	16.4	15.6	14.2	14.8	17.6	15.4	16.4	14.7	17.1	17.2	16.1	14.1	14.4	15.2	12.4
21	KJ598040_Osedax_rogersi	21	21	19	18	16.8	15.8	15	15.9	16.8	17.4	16.9	15.4	16.2	16.4	15.9	14.7	14.7	13.8	15.4	14.8
22	FJ347643_Osedax_lonnyi	21.2	20.3	19.5	16.5	17.2	14.9	15.9	15.1	17.7	16.4	16.7	15.7	15.8	16	18	14.4	14.3	13.2	13.7	12.5	12.4
23	KF444422_Osedax_antarcticus	23.5	19.3	21.1	20.1	21.8	18.2	18.4	17.8	21.2	18	18.9	16.1	17.4	17.6	18.9	18.2	18	15.8	18.6	17.2	15.2	14.6
24	KJ598038_Osedax_crouchi	21.5	19.9	20.7	16.8	17	15.7	14.9	17.1	16.7	16.8	16.9	14.3	17	17	15.9	14	14.1	14.8	15.3	14.3	15.4	13.5	13.8
25	MH616012_Osedax_BioSuOr_4	21.9	20.4	20.1	21.6	18	18.4	20.2	19.4	20	19.8	20.4	18.8	18.2	18	20.2	18.6	18.6	19.6	19.6	20.4	20	20.2	18.2	18.6
26	AY827562_Osedax_mucofloris	22.3	20.5	19.5	17	18.7	16.8	17.9	19.7	20.3	19.5	18.1	17.2	19.3	19.3	18	17.9	17.8	19.8	19.1	17.6	18.1	19.5	21.3	17.8	18.8
27	JX280613_Osedax_MB16	19.6	22.5	17.6	17.6	17.8	16.7	19.6	15.6	16.3	17.5	18.6	17.3	18.8	18.8	17.6	18	17.8	18.4	16.7	15.5	16.6	16.2	20.3	16.7	19.2	18.3
28	FJ347615_Osedax_randyi	21	22.6	18.2	17.9	19.1	17.7	19.3	16.4	17.1	17.7	17.7	18.6	19.3	19.3	17.6	19.3	19.4	18.8	18.1	16.6	17.4	16.6	19.5	18.1	19.8	18.1	6.7
29	FM998109_Osedax_Sagami7	20.8	22.6	18	17.5	19.5	17.8	19.3	16.3	17.1	17.8	17.6	18.5	19.3	19.3	17.8	19.5	19.6	18.8	17.7	16.5	17.6	16.7	19.7	18.2	20.2	17.8	6.4	0.5
30	FM998111_Osedax_japonicus	19.5	19.2	18.8	16.5	16.7	18.7	17.8	16.4	17	17.3	16.9	17	18.9	18.9	18.9	17.7	17.8	19	16.9	16	17.2	17	18.2	17.9	17.4	15.2	13.4	14.2	14.3
31	FJ347629_Osedax_packardorum	21.6	20.1	20.1	17	16.7	18.4	16.9	18	17.1	17.2	18.5	19.1	17.9	17.9	20	17.2	17.1	21.5	18.7	16.8	18.2	17.8	21.4	18.6	17	15.8	16.8	15.4	15.9	13
32	DQ996635_Osedax_lehmani	22.3	19.8	19.8	16.8	15.7	17.2	17.5	16.3	16.9	17.5	17.6	19.3	19.3	19.1	19.6	18.3	18.4	20.6	18	16.7	17.5	17.3	21.2	17.3	16.4	15.9	14.6	15.7	15.8	14	7.9
33	JX280609_Osedax_bryani	22.2	19.4	21.3	18.5	17.3	17.9	17.9	19.1	17	16.9	19	17.9	17.6	17.8	18.7	17.1	17	17.4	18.8	18	18.1	15.6	18.4	17.5	17	19.7	18	17.8	18	17.2	16.8	17.4
34	LC381421_Osedax_braziliensis	18.8	18.8	17.8	17.1	17.7	17	17.4	16.9	16.2	16.2	16.9	16	17	17.3	17.4	16.1	16	19	15.7	17	16.4	16.2	17	17.3	18.4	17.4	15.8	15.3	15.2	15.2	17.6	17.2	17.4
35	FJ347607_Osedax_frankpressi	19.5	18.7	22.2	17.7	17.7	18.5	16.9	17.8	18	15.9	17.2	16.6	18.5	18.4	18.3	16.6	16.3	19.4	15.9	16.8	16.8	17.5	18	17.2	16.8	17.4	16.5	16.6	16.5	16.1	17.1	16.4	18	10.3
36	MH616017_Osedax_frankpressi	20.8	19.1	22.1	18.3	18.7	20.6	17.6	18.7	17	17.2	17.2	18.3	19.7	20	18.3	17.2	16.8	20.2	16.3	18.3	17.8	19.7	20.2	18.9	17.4	17.2	18	16.6	16.8	17.4	16.1	16.1	18.5	10.6	3
37	CB2-22_Osedax_fenrisi	21.6	18.9	21.1	20.1	19.5	18.9	18.7	17	18.2	16.5	16.7	16.3	16.7	16.7	16.8	17.4	18	16.4	18	16.5	16.7	15.7	17.6	16.3	16.8	19.1	16.7	16.9	16.9	17	18.6	18	17.2	18.4	18.4	19.3
38	CB2-28_Osedax_fenrisi	21.6	18.9	21.3	20.3	19.5	18.9	18.9	17	18.2	16.5	16.7	16.3	16.7	16.7	16.8	17.4	18	16.2	18.2	16.5	16.7	15.5	17.8	16.3	16.6	18.9	16.7	16.9	16.9	17.2	18.6	18	17	18.6	18.4	19.1	0.4
39	FJ347609_Osedax_roseus	20.5	19.9	19.3	16.9	18.2	18.7	16.8	16.8	16.8	16	17.4	17.7	16.7	16.5	17.6	16.8	17	16.4	16.3	16.1	17.5	16.2	16.9	16.4	16.6	17.8	16.8	17.1	17.3	15	16.1	15.8	16.4	15.5	15.8	14.4	18.7	18.7
40	FM998081_Osedax_Sagami3	21.7	20.8	21.5	17.8	16.5	17.9	18.1	18.1	18.6	16.9	18	17.3	17.3	17.4	18.7	18.1	18.2	18.2	17.9	16.2	17.6	17.3	18.6	16.4	15.4	18.7	17.2	17.3	17.6	16.4	15.7	14.6	16.2	17	16	17.2	18	17.8	14.4
41	FM998082_Osedax_Sagami4	20.5	22.3	19.5	18	17.9	17.6	18	16.2	17.2	15.9	15.8	17.5	18.1	18	17.4	16.7	16.7	15.4	16.9	14.7	17.7	15	17.2	15.2	15.8	18.3	16.7	15.1	15	15.3	15	15.6	15.7	16.1	16.9	16.8	14.8	14.6	13.4	13.7
42	EU852488_Osedax_rubiplumus	21.4	20.7	21	17.3	17.8	17.7	17.7	16.5	18.3	15.5	15.8	18	16.9	16.9	20.4	16.1	16.1	17.4	17.2	14.5	17.4	15.2	17.6	15.9	16.6	19.8	16.3	16.5	16.2	15.4	15.8	15.3	14.6	16.1	16.4	17.2	18.2	18.2	13.7	13.8	11.6
43	MN699849_Osedax_rubiplumus_SWIR	21.9	20.5	20.9	17.3	18.1	17.5	17.7	16.4	18.2	15.7	15.5	18.1	17.1	17.1	20	16.2	16.2	16.8	17.1	14.6	17.1	15.2	17	15.8	16.6	19.1	16.5	16.4	16.1	15.2	15.5	15.3	15.1	16	16.6	17.4	18	18	13.7	13.9	11.4	1
	Supplementary table 1. Pairwise p-distances for COI, calculated in Geneious. Osedax fenrisi sp. nov. is highlighted in grey

## Sheet: Ark2
		1	2	3	4	5	6	7	8	9	10	11	12	13	14	15	16	17	18	19	20	21	22	23	24	25	26	27	28	29	30	31	32	33	34	35	36	37	38	39	40	41	42
1	FJ347644_Sclerolinum_brattstromi
2	KF444428_Osedax_deceptionensis	24.3
3	MH616081_Osedax_BioSuOr_2	23	22.8
4	FJ347638_Osedax_jabba	20.1	22.1	18.4
5	FJ347621_Osedax_talkovici	22.1	19.2	19.5	17.1
6	FJ347635_Osedax_knutei	21.8	20.1	19.3	17	16.9
7	FJ347624_Osedax_tiburon	21.6	19.9	21.5	17.3	17.7	16.7
8	KP119564_Osedax_priapus	21.4	20.1	17.8	16.4	17.1	17.9	16.4
9	KT860548_Osedax_Mediterranea	21.1	19.7	18.2	17.4	16	20.2	17.4	14.6
10	FJ347642_Osedax_sigridae	20.5	17.9	18.6	17.6	16.4	18.3	16.1	13.7	13.6
11	FM998083_Osedax_Sagami5	20.9	20.3	18.6	17.7	17.2	17.9	17.2	14.6	14.3	10.5
12	KJ598039_Osedax_nordenskjoeldi	21.8	19.7	18.6	18.1	17	16.6	14.8	15.7	17.9	15.6	16.8
13	FM998110_Osedax_Sagami8	21.6	19.2	19.3	17.5	18.1	15.8	16.7	18.1	18.8	17.1	17.5	16
14	FJ347631_Osedax_westernflyer	21.8	19.6	19.3	17.4	18.1	16	16.7	18.2	18.8	17.1	17.5	16.2	0.5
15	MH616036_Osedax_BioSuOr_1	21.7	18.9	17.4	15.7	17.8	15.9	17.4	14	14.9	15.1	15.7	14.9	14.6	15.1
16	FJ347626_Osedax_dockricketts	21	20.7	21.7	16.9	17.1	15.1	15.1	16.5	17.4	17	17	16.2	14.2	14.5	12.5
17	FM998107_Osedax_Sagami6	21.1	20.8	22.4	17	17.3	14.8	15.1	16.4	17.1	17.1	17	16.4	14.3	14.6	13	0.9
18	MH616075_Osedax_BioSuOr_3	25.2	21.1	19.7	19	20.6	18.2	18.4	17	19	18.6	18.8	17.6	17	17	16.6	16	16.4
19	EU236218_Osedax_ventana	21.2	19.7	19.5	15.6	17.6	16.4	14.6	16.1	17.8	16.2	16.6	15.1	15.6	15.9	14.9	13.5	13.9	16.4
20	KP119563_Osedax_ryderi	21.7	20.5	19.5	16	16.4	15.6	14.2	14.8	17.6	15.4	16.4	14.7	17.1	17.2	16.1	14.1	14.4	15.2	12.4
21	KJ598040_Osedax_rogersi	21	21	19	18	16.8	15.8	15	15.9	16.8	17.4	16.9	15.4	16.2	16.4	15.9	14.7	14.7	13.8	15.4	14.8
22	FJ347643_Osedax_lonnyi	21.2	20.3	19.5	16.5	17.2	14.9	15.9	15.1	17.7	16.4	16.7	15.7	15.8	16	18	14.4	14.3	13.2	13.7	12.5	12.4
23	KF444422_Osedax_antarcticus	23.5	19.3	21.1	20.1	21.8	18.2	18.4	17.8	21.2	18	18.9	16.1	17.4	17.6	18.9	18.2	18	15.8	18.6	17.2	15.2	14.6
24	KJ598038_Osedax_crouchi	21.5	19.9	20.7	16.8	17	15.7	14.9	17.1	16.7	16.8	16.9	14.3	17	17	15.9	14	14.1	14.8	15.3	14.3	15.4	13.5	13.8
25	MH616012_Osedax_BioSuOr_4	21.9	20.4	20.1	21.6	18	18.4	20.2	19.4	20	19.8	20.4	18.8	18.2	18	20.2	18.6	18.6	19.6	19.6	20.4	20	20.2	18.2	18.6
26	AY827562_Osedax_mucofloris	22.3	20.5	19.5	17	18.7	16.8	17.9	19.7	20.3	19.5	18.1	17.2	19.3	19.3	18	17.9	17.8	19.8	19.1	17.6	18.1	19.5	21.3	17.8	18.8
27	JX280613_Osedax_MB16	19.6	22.5	17.6	17.6	17.8	16.7	19.6	15.6	16.3	17.5	18.6	17.3	18.8	18.8	17.6	18	17.8	18.4	16.7	15.5	16.6	16.2	20.3	16.7	19.2	18.3
28	FJ347615_Osedax_randyi	21	22.6	18.2	17.9	19.1	17.7	19.3	16.4	17.1	17.7	17.7	18.6	19.3	19.3	17.6	19.3	19.4	18.8	18.1	16.6	17.4	16.6	19.5	18.1	19.8	18.1	6.7
29	FM998109_Osedax_Sagami7	20.8	22.6	18	17.5	19.5	17.8	19.3	16.3	17.1	17.8	17.6	18.5	19.3	19.3	17.8	19.5	19.6	18.8	17.7	16.5	17.6	16.7	19.7	18.2	20.2	17.8	6.4	0.5
30	FM998111_Osedax_japonicus	19.5	19.2	18.8	16.5	16.7	18.7	17.8	16.4	17	17.3	16.9	17	18.9	18.9	18.9	17.7	17.8	19	16.9	16	17.2	17	18.2	17.9	17.4	15.2	13.4	14.2	14.3
31	FJ347629_Osedax_packardorum	21.6	20.1	20.1	17	16.7	18.4	16.9	18	17.1	17.2	18.5	19.1	17.9	17.9	20	17.2	17.1	21.5	18.7	16.8	18.2	17.8	21.4	18.6	17	15.8	16.8	15.4	15.9	13
32	DQ996635_Osedax_lehmani	22.3	19.8	19.8	16.8	15.7	17.2	17.5	16.3	16.9	17.5	17.6	19.3	19.3	19.1	19.6	18.3	18.4	20.6	18	16.7	17.5	17.3	21.2	17.3	16.4	15.9	14.6	15.7	15.8	14	7.9
33	JX280609_Osedax_bryani	22.2	19.4	21.3	18.5	17.3	17.9	17.9	19.1	17	16.9	19	17.9	17.6	17.8	18.7	17.1	17	17.4	18.8	18	18.1	15.6	18.4	17.5	17	19.7	18	17.8	18	17.2	16.8	17.4
34	LC381421_Osedax_braziliensis	18.8	18.8	17.8	17.1	17.7	17	17.4	16.9	16.2	16.2	16.9	16	17	17.3	17.4	16.1	16	19	15.7	17	16.4	16.2	17	17.3	18.4	17.4	15.8	15.3	15.2	15.2	17.6	17.2	17.4
35	FJ347607_Osedax_frankpressi	19.5	18.7	22.2	17.7	17.7	18.5	16.9	17.8	18	15.9	17.2	16.6	18.5	18.4	18.3	16.6	16.3	19.4	15.9	16.8	16.8	17.5	18	17.2	16.8	17.4	16.5	16.6	16.5	16.1	17.1	16.4	18	10.3
36	MH616017_Osedax_frankpressi	20.8	19.1	22.1	18.3	18.7	20.6	17.6	18.7	17	17.2	17.2	18.3	19.7	20	18.3	17.2	16.8	20.2	16.3	18.3	17.8	19.7	20.2	18.9	17.4	17.2	18	16.6	16.8	17.4	16.1	16.1	18.5	10.6	3
37	CB2-22_Osedax_LOKI	21.6	18.9	21.1	20.1	19.5	18.9	18.7	17	18.2	16.5	16.7	16.3	16.7	16.7	16.8	17.4	18	16.4	18	16.5	16.7	15.7	17.6	16.3	16.8	19.1	16.7	16.9	16.9	17	18.6	18	17.2	18.4	18.4	19.3
38	CB2-28_Osedax_LOKI	21.6	18.9	21.3	20.3	19.5	18.9	18.9	17	18.2	16.5	16.7	16.3	16.7	16.7	16.8	17.4	18	16.2	18.2	16.5	16.7	15.5	17.8	16.3	16.6	18.9	16.7	16.9	16.9	17.2	18.6	18	17	18.6	18.4	19.1	0.4
39	FJ347609_Osedax_roseus	20.5	19.9	19.3	16.9	18.2	18.7	16.8	16.8	16.8	16	17.4	17.7	16.7	16.5	17.6	16.8	17	16.4	16.3	16.1	17.5	16.2	16.9	16.4	16.6	17.8	16.8	17.1	17.3	15	16.1	15.8	16.4	15.5	15.8	14.4	18.7	18.7
40	FM998081_Osedax_Sagami3	21.7	20.8	21.5	17.8	16.5	17.9	18.1	18.1	18.6	16.9	18	17.3	17.3	17.4	18.7	18.1	18.2	18.2	17.9	16.2	17.6	17.3	18.6	16.4	15.4	18.7	17.2	17.3	17.6	16.4	15.7	14.6	16.2	17	16	17.2	18	17.8	14.4
41	FM998082_Osedax_Sagami4	20.5	22.3	19.5	18	17.9	17.6	18	16.2	17.2	15.9	15.8	17.5	18.1	18	17.4	16.7	16.7	15.4	16.9	14.7	17.7	15	17.2	15.2	15.8	18.3	16.7	15.1	15	15.3	15	15.6	15.7	16.1	16.9	16.8	14.8	14.6	13.4	13.7
42	EU852488_Osedax_rubiplumus	21.4	20.7	21	17.3	17.8	17.7	17.7	16.5	18.3	15.5	15.8	18	16.9	16.9	20.4	16.1	16.1	17.4	17.2	14.5	17.4	15.2	17.6	15.9	16.6	19.8	16.3	16.5	16.2	15.4	15.8	15.3	14.6	16.1	16.4	17.2	18.2	18.2	13.7	13.8	11.6
43	MN699849_Osedax_rubiplumus_SWIR	21.9	20.5	20.9	17.3	18.1	17.5	17.7	16.4	18.2	15.7	15.5	18.1	17.1	17.1	20	16.2	16.2	16.8	17.1	14.6	17.1	15.2	17	15.8	16.6	19.1	16.5	16.4	16.1	15.2	15.5	15.3	15.1	16	16.6	17.4	18	18	13.7	13.9	11.4	1
